# Supplementary material for: A salamander that chews using complex, three-dimensional mandible movements
Source: Oxford University Press journal article supplement (doi:10.1242/jeb.220749), 2020-01-01
Supplement: jeb220749supp.pdf [file jeb220749supp.pdf]

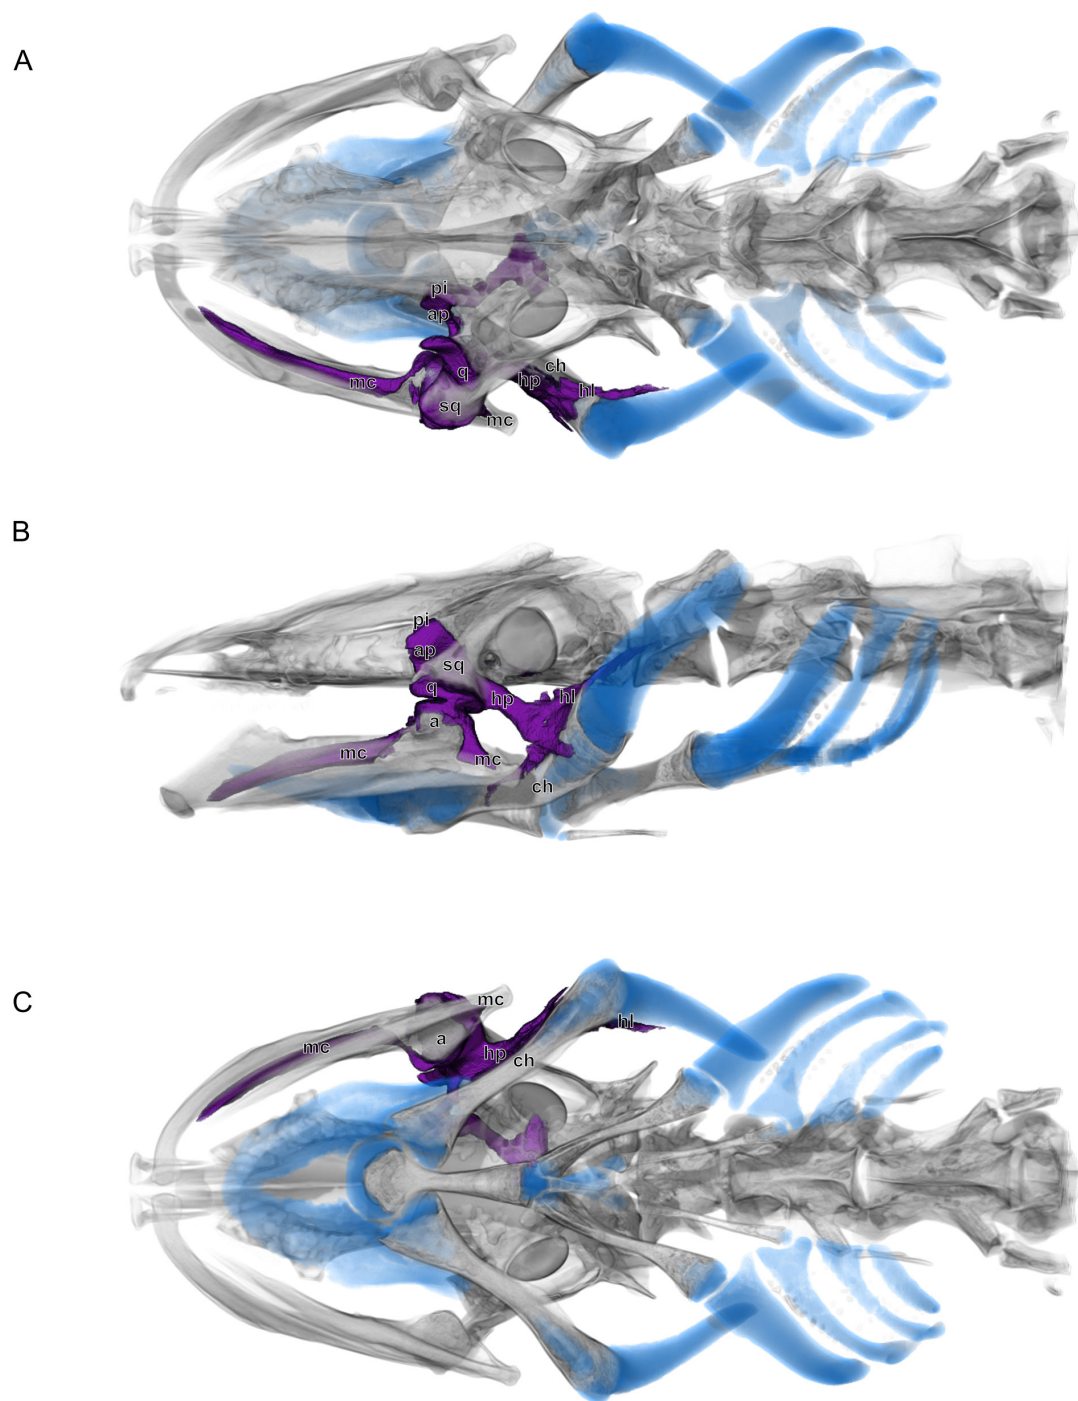

Fig. S1. Morphology of the jaw-joint-complex. A, dorsal; B, lateral and C, ventral views. Bony tissue is highlighted in grey, cartilages in blue, and the jaw-joint-complex in purple. Components of the jaw joint complex: a, articular; ap, ascending process; ch, ceratohyal; hl, hyoquadrate ligament; hp, hyoquadrate process; mc, Meckel's cartilage; pi, pila antotica; q, quadrate and sq, squamosal.

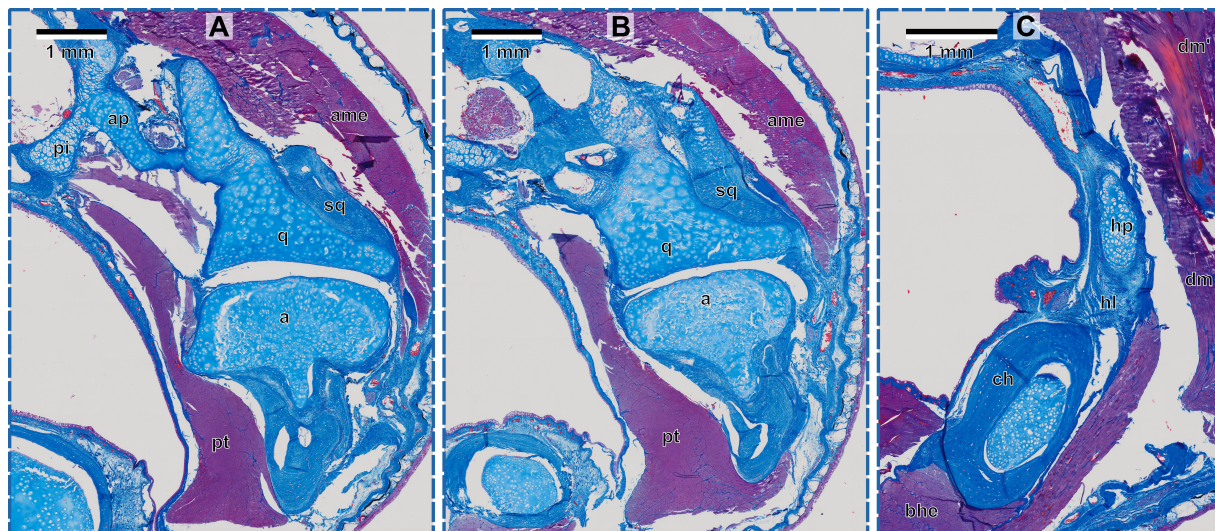

Fig. S2. Cross sections from different areas of the jaw joint-complex. Abbreviations: a, articular; ame, adductor mandibulae externus; ap, ascending process; bhe, branchiohyoideus externus; ch, ceratohyal; dm, depressor mandibulae (anterior); dm', depressor mandibulae posterior; hl, hyoquadrate ligament; hp, hyoquadrate process; pt, pterygoideus; pi, pila antotica; q, quadrate and sq, squamosal. Muscles are purple while bones and cartilages are blue in histological sections.

Table S1. Kinematic variables of chewing in *S. intermedia* with descriptive statistics

| Component motion                   | Variable                                  | Description                                                                                            | Value             |
|------------------------------------|-------------------------------------------|--------------------------------------------------------------------------------------------------------|-------------------|
| Propalinal mandible movement       | Mandible retraction                       | Distance from start to maximal retracted position of the mandible                                      | 9.77 ± 3.53 % CL  |
|                                    | Mandible protraction                      | Distance from maximal retracted to maximal protracted position of the mandible                         | 11.72 ± 3.49 % CL |
|                                    | Duration mandible retraction              | Time from start retraction until maximal retraction of the mandible                                    | 146 ± 59 ms       |
|                                    | Duration mandible protraction             | Time from start protraction until maximal protraction of the mandible                                  | 178 ± 41 ms       |
| Vertical mandible movement         | Gape closing                              | Distance from start of closure to maximal gape closure                                                 | 7.74 ± 3.59 % CL  |
|                                    | Gape opening                              | Distance from closed gape to maximal gape opening                                                      | 6.82 ± 2.88 % CL  |
|                                    | Duration gape closing                     | Time from start gape closure until maximal closure                                                     | 99 ± 49 ms        |
|                                    | Duration gape opening                     | Time from gape closure until maximal gape opening                                                      | 141 ± 57 ms       |
| Longitudinal hyobranchial movement | Hyobranchial protraction                  | Distance from start to maximal protracted position of the hyobranchium                                 | 2.89 ± 1.57 % CL  |
|                                    | Hyobranchial retraction                   | Distance from maximal protracted position to maximal retracted position of the hyobranchium            | 3.12 ± 2.05 % CL  |
|                                    | Duration hyobranchial protraction         | Time from start protraction until maximal protraction of the hyobranchium                              | 95 ± 55 ms        |
|                                    | Duration hyobranchial retraction          | Time from maximal protraction until maximal retraction of the hyobranchium                             | 112 ± 57 ms       |
| Vertical hyobranchial movement     | Hyobranchial depression                   | Distance from start to maximal depressed position of the hyobranchium                                  | 11.79 ± 5.71 % CL |
|                                    | Hyobranchial elevation                    | Distance from maximal depressed position to maximal elevation position of the hyobranchium             | 15.38 ± 5.36 % CL |
|                                    | Duration hyobranchial depression          | Time from start depression until maximal depression of the hyobranchium                                | 129 ± 62 ms       |
|                                    | Duration hyobranchial elevation           | Time from maximal depression until maximal elevation of the hyobranchium                               | 114 ± 103 ms      |
| Vertical cranial movement          | Neck flexion (cranial 'ventroflexion')    | Angular displacement from start to maximum neck flexion relative to the trunk                          | 7.59 ± 3.16 °     |
|                                    | Neck extension (cranial 'dorsoflexion')   | Angular displacement from maximum neck flexion to maximum neck extension relative to the trunk         | 7.10 ± 3.37 °     |
|                                    | Duration neck flexion                     | Time from start flexion until maximal flexion of the neck                                              | 99 ± 42 ms        |
|                                    | Duration neck extension                   | Time from maximal flexion until maximal extension of the neck                                          | 128 ± 67 ms       |
| Transverse mandible movement       | Medio-lateral mandible abduction          | Angular displacement from start to maximum medio-lateral abduction of the mandible                     | 4.22 ± 1.70 °     |
|                                    | Medio-lateral mandible adduction          | Angular displacement from maximum medio-lat. abduction to maximum medio-lat. adduction of the mandible | 4.95 ± 2.05 °     |
|                                    | Duration medio-lateral mandible abduction | Time from start medio-lateral abduction until maximal medio-lateral abduction of the neck              | 156 ± 60 ms       |
|                                    | Duration medio-lateral mandible adduction | Time from maximal medio-lateral abduction until maximal medio-lateral adduction of the neck            | 146 ± 53 ms       |

Data are means ± SD. Distances normalized by cranial length (% CL).
